# Supplementary material for: Extracorporeal Membrane Oxygenation Support for Failure to Wean From Cardiopulmonary Bypass After Pediatric Cardiac Surgery: Analysis of Extracorporeal Life Support Organization Registry Data
Source: PubMed Central journal article supplement — Crit Care Explor. 2020 Sep 15;2(9):e0183. doi: 10.1097/CCE.0000000000000183 (PMC7498130; doi:10.1097/cce.0000000000000183), 2020-09-15
Supplement: cc9-2-e0183-s001.pdf [file cc9-2-e0183-s001.pdf]

**Extracorporeal membrane oxygenation support for failure to wean from cardiopulmonary bypass after pediatric cardiac surgery: analysis of ELSO Registry data**

Francesca Sperotto, Paola Cogo, Angela Amigoni, Andrea Pettenazzo, Ravi R. Thiagarajan, Angelo Polito

**Supplemental Digital Content**

**Content details:**

- **Supplemental Figure 1.** Study flow chart.
- **Supplemental Figure 2.** Volume of extracorporeal membrane oxygenation cases of failure to wean from cardiopulmonary bypass per year and associated in-hospital mortality.
- **Supplemental Table 1.** Cardiac surgical procedures and associated in-hospital mortality in patients using Extracorporeal Membrane Oxygenation after failure to wean from cardiopulmonary bypass.
- **Supplemental Table 2.** Multivariable models of factors associated with mortality in patients using extracorporeal membrane oxygenation after failure to wean from cardiopulmonary bypass.
- **Supplemental Information.** ICD9, ICD10 and CPT web references.

Supplemental Figure 1. Study flow chart.

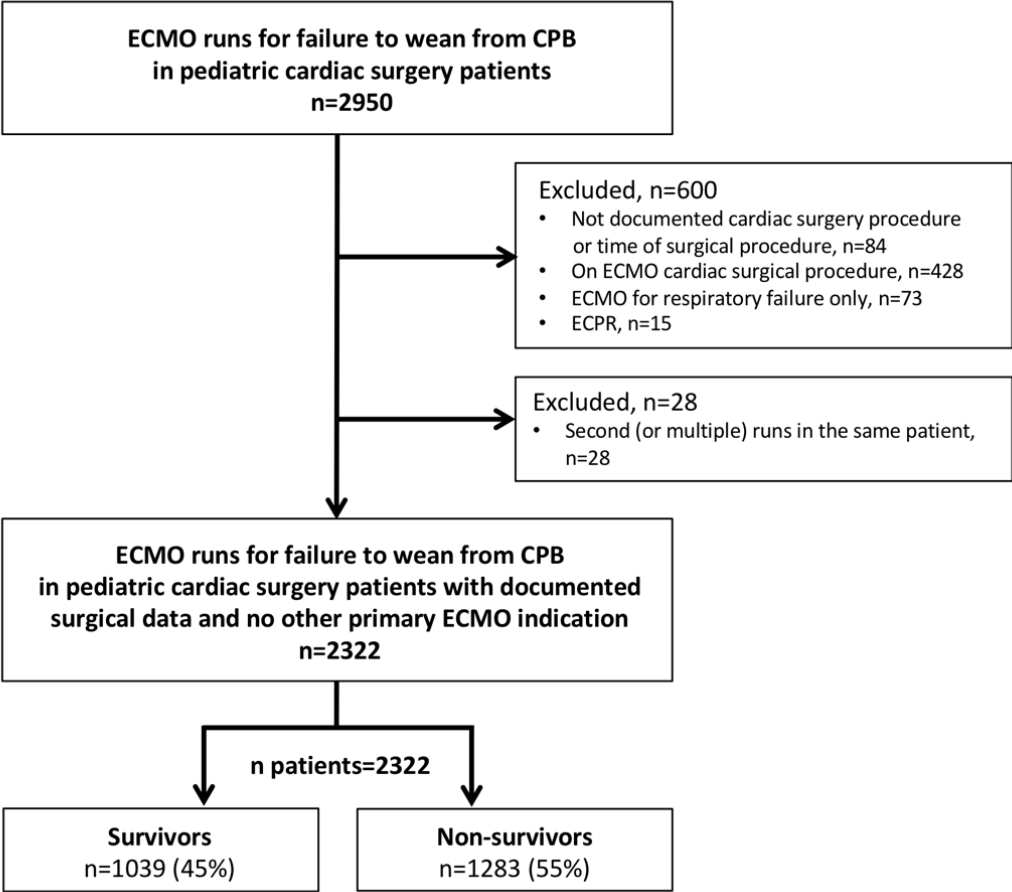

**Supplemental Figure 2.** Volume of extracorporeal membrane oxygenation cases of failure to wean from cardiopulmonary bypass per year and associated in-hospital mortality.

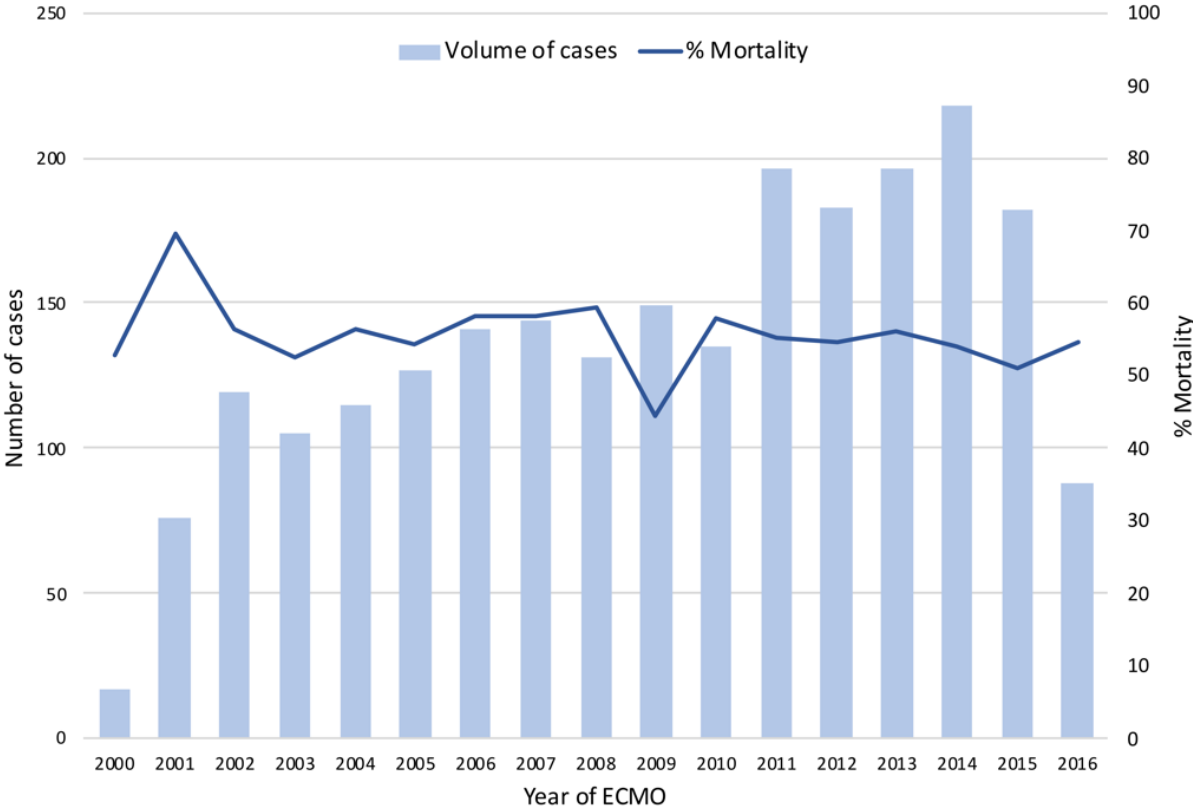

**Supplemental Table 1.** Cardiac surgical procedures and associated in-hospital mortality in patients using Extracorporeal Membrane Oxygenation after failure to wean from cardiopulmonary bypass.

| Cardiac surgical procedure, n (%)                                    | Total (n=2322) | % Mortality | Survivors (n=1039) | Non-survivors (n=1283) | p-value            |
|----------------------------------------------------------------------|----------------|-------------|--------------------|------------------------|--------------------|
| ALCAPA/ARCAPA repair                                                 | 77 (3)         | 45          | 42 (4)             | 35 (3)                 | 0.079              |
| Aortic arch, Coarctation, Supra-aortic stenosis repair               | 96 (4)         | 56          | 42 (4)             | 54 (4)                 | 0.841              |
| Aortic arch repair in single ventricle physiology                    | 6 (0)          | 50          | 3 (0)              | 3 (0)                  | 1.000 <sup>#</sup> |
| Aortic arch repair + PA band                                         | 20 (1)         | 50          | 10 (1)             | 10 (1)                 | 0.635              |
| Ross, Ross-Konno operation                                           | 33 (1)         | 60          | 13 (1)             | 20 (2)                 | 0.533              |
| VSD + Aortic arch repair                                             | 34 (2)         | 62          | 13 (1)             | 21 (2)                 | 0.442              |
| Aortic valve surgery/replacement                                     | 39 (2)         | 46          | 21 (2)             | 18 (2)                 | 0.249              |
| ASD + isolated PAPVR repair                                          | 7 (0)          | 43          | 4 (0)              | 3 (0)                  | 0.707 <sup>#</sup> |
| ASO                                                                  | 138 (6)        | 56          | 61 (6)             | 77 (6)                 | 0.895              |
| ASO + VSD repair                                                     | 85 (4)         | 60          | 34 (3)             | 51 (4)                 | 0.370              |
| ASO + Coarctation/Aortic arch repair                                 | 36 (2)         | 64          | 13 (1)             | 23 (2)                 | 0.294              |
| Atrial septectomy, isolated                                          | 4 (0)          | 100         | 0 (0)              | 4 (0)                  | 0.133 <sup>#</sup> |
| CAVC repair                                                          | 84 (4)         | 56          | 37 (4)             | 47 (4)                 | 0.896              |
| Cor triatriatum repair                                               | 4 (0)          | 75          | 1 (0)              | 3 (0)                  | 0.633 <sup>#</sup> |
| VAD positioning                                                      | 4 (0)          | 50          | 2 (0)              | 2 (0)                  | 1.000 <sup>#</sup> |
| Coronary surgery repair, not ALCAPA/ARCAPA                           | 15 (1)         | 40          | 9 (1)              | 6 (1)                  | 0.233              |
| Damus-Kaye-Stansel procedure                                         | 44 (2)         | 54          | 20 (2)             | 24 (2)                 | 0.924              |
| IAA repair, including Yasui procedure                                | 49 (2)         | 61          | 19 (2)             | 30 (2)                 | 0.396              |
| DORV repair                                                          | 19 (1)         | 47          | 10 (1)             | 9 (1)                  | 0.488              |
| DORV + ASO, with or without Aortic arch repair                       | 68 (3)         | 59          | 28 (3)             | 40 (3)                 | 0.548              |
| DORV TOF repair                                                      | 39 (2)         | 38          | 24 (2)             | 15 (1)                 | 0.033              |
| Double switch operation                                              | 8 (0)          | 50          | 4 (0)              | 4 (0)                  | 1.000 <sup>#</sup> |
| Ebstein's anomaly repair, all procedures                             | 30 (1)         | 60          | 12 (1)             | 18 (2)                 | 0.599              |
| Fontan procedure                                                     | 26 (1)         | 46          | 14 (1)             | 12 (1)                 | 0.348              |
| Glenn procedure                                                      | 74 (3)         | 55          | 33 (3)             | 41 (3)                 | 0.979              |
| Mustard/Senning procedure for d-TGA                                  | 7 (0)          | 57          | 3 (0)              | 4 (0)                  | 1.000 <sup>#</sup> |
| Mitral valve surgery/replacement                                     | 53 (2)         | 51          | 26 (3)             | 27 (2)                 | 0.523              |
| Cardiac tumor surgery                                                | 9 (0)          | 56          | 4 (0)              | 5 (0)                  | 0.985              |
| Norwood procedure                                                    | 515 (22)       | 58          | 215 (21)           | 300 (23)               | 0.121              |
| RVOTO repair, pulmonary valve surgery/replacement, Branch PA surgery | 38 (2)         | 50          | 19 (2)             | 19 (2)                 | 0.511              |
| Pulmonary vein surgery, not TAPVR                                    | 5 (0)          | 80          | 1 (0)              | 4 (0)                  | 0.388              |
| RV-PA conduit replacement, isolated                                  | 34 (2)         | 50          | 17 (2)             | 17 (1)                 | 0.535              |
| LVOTO surgery including Konno procedure, Subaortic stenosis repair   | 16 (1)         | 44          | 9 (1)              | 7 (1)                  | 0.353              |
| Systemic-PA shunt                                                    | 67 (3)         | 55          | 30 (3)             | 37 (3)                 | 0.996              |
| TAPVR repair                                                         | 123 (5)        | 64          | 44 (4)             | 79 (6)                 | 0.040              |
| TOF + pulmonary atresia repair, including unifocalization            | 71 (3)         | 55          | 32 (3)             | 39 (3)                 | 0.955              |
| TOF + pulmonary stenosis repair                                      | 61 (3)         | 51          | 30 (3)             | 31 (2)                 | 0.480              |
| TOF + CAVC repair                                                    | 15 (1)         | 73          | 4 (1)              | 11 (1)                 | 0.158              |
| Heart transplant                                                     | 110 (5)        | 58          | 46 (4)             | 64 (5)                 | 0.527              |
| Truncus arteriosus repair, including Truncus + IAA                   | 76 (3)         | 45          | 42 (4)             | 34 (3)                 | 0.061              |
| Tricuspid valve surgery/replacement                                  | 11 (0)         | 36          | 7 (1)              | 4 (0)                  | 0.236 <sup>#</sup> |
| VSD closure                                                          | 61 (3)         | 41          | 36 (4)             | 25 (2)                 | 0.023              |
| CAVC + Coarctation/Aortic arch repair                                | 9 (0)          | 44          | 5 (1)              | 4 (0)                  | 0.525              |
| Other procedures*                                                    | 2 (0)          | 100         | 0 (0)              | 2 (0)                  | 0.505 <sup>#</sup> |

ALCAPA: Anomalous Left Coronary Artery from Pulmonary Artery; ARCAPA: Anomalous Right Coronary Artery from Pulmonary Artery; ASD: Atrial Septal Defect; ASO: Aortic Switch Operation; CAVC: Complete Atrioventricular Canal; Cardio-Pulmonary Bypass; DORV: Double Outlet Right Ventricle; d-TGA: d-Transposition of the Great Arteries; ECMO: Extra-Corporeal Membrane Oxygenation; PA: Pulmonary Artery; IAA: Interrupted Aortic Arch; LVOTO: Left Ventricular Outflow Tract Obstruction; PAPVR: Partial Anomalous Pulmonary Venous Return; RV: Right Ventricle; RVOTO: Right Ventricular Outflow Tract Obstruction; TAPVR: Total Anomalous Pulmonary Venous Return; TOF: Tetralogy of Fallot; VAD: Ventricular Assist Device; VSD: Ventricular Septal Defect  
\*Other procedures are palliative ASO in Single Ventricle with Tricuspid Atresia (n=1) and Pericardial Window (n=1); <sup>#</sup>Fisher's Exact Test

**Supplemental Table 2.** Multivariable models of factors associated with mortality in patients using extracorporeal membrane oxygenation after failure to wean from cardiopulmonary bypass.

| Variables                                              | Odds Ratio | 95% Confidence Interval | p-value |
|--------------------------------------------------------|------------|-------------------------|---------|
| <b>Model I: Pre-ECMO factors</b>                       |            |                         |         |
| Demographic and baseline clinical characteristics      |            |                         |         |
| Age (days)                                             |            |                         | <0.001  |
| ≤ 7                                                    | 1.0        | Reference group         | -       |
| > 7 and ≤ 26                                           | 0.793      | 0.603-1.042             | 0.096   |
| > 26 and ≤ 159                                         | 0.541      | 0.409-0.715             | <0.001  |
| > 159                                                  | 0.468      | 0.345-0.635             | <0.001  |
| Race (white)                                           | 0.783      | 0.646-0.948             | 0.012   |
| Genetic syndrome or congenital anomalies               | 1.668      | 1.290-2.157             | <0.001  |
| Comorbidities                                          | 1.727      | 1.428-2.087             | <0.001  |
| Pre-ECMO cardiac arrest                                | 1.596      | 1.161-2.194             | 0.004   |
| Surgery details                                        |            |                         |         |
| CPB time (min)                                         |            |                         | <0.001  |
| ≤ 174                                                  | 1          | Reference group         | -       |
| > 174 and ≤ 251                                        | 0.982      | 0.754-1.279             | 0.893   |
| > 251 and ≤ 351                                        | 1.525      | 1.166-1.994             | 0.002   |
| > 351                                                  | 1.851      | 1.409-2.431             | <0.001  |
| RACHS-1 category                                       |            |                         | 0.003   |
| RACHS-1 1 to 3                                         | 1          | Reference group         | -       |
| RACHS-1 4 to 6                                         | 1.449      | 1.159-1.810             | 0.001   |
| RACHS not assigned                                     | 0.887      | 0.557-1.415             | 0.615   |
| Pre-ECMO details                                       |            |                         |         |
| Pre-ECMO MV duration>24h                               | 1.611      | 1.319-1.968             | <0.001  |
| Pre-ECMO bicarbonate infusion                          | 1.408      | 1.091-1.818             | 0.009   |
| <b>Model II: ECMO factors and complications</b>        |            |                         |         |
| ECMO factors                                           |            |                         |         |
| Left atrium cannulation                                | 0.659      | 0.494-0.879             | 0.005   |
| ECMO pump flow at 4h after ECMO initiation (ml/kg/min) |            |                         | <0.001  |
| ≤ 95                                                   | 1          | Reference group         | -       |
| > 95 and ≤ 115                                         | 1.296      | 0.985-1.704             | 0.064   |
| > 115 and ≤ 141                                        | 1.529      | 1.161-2.014             | 0.003   |
| > 141                                                  | 1.827      | 1.379-2.421             | <0.001  |
| ECMO support duration (h)                              |            |                         | <0.001  |
| ≤ 65                                                   | 1          | Reference group         | -       |
| > 65 and ≤ 104                                         | 0.937      | 0.711-1.234             | 0.641   |
| > 104 and ≤ 169                                        | 1.732      | 1.319-2.273             | <0.001  |
| > 169                                                  | 3.873      | 2.860-5.245             | <0.001  |
| On-ECMO details                                        |            |                         |         |
| FiO2 at 24h after ECMO initiation (%)                  |            |                         | 0.001   |
| ≤ 25                                                   | 1          | Reference group         | -       |
| > 25 and ≤ 37                                          | 0.639      | 0.484-0.843             | 0.002   |
| > 37 and ≤ 40                                          | 0.582      | 0.444-0.764             | <0.001  |
| > 40                                                   | 0.711      | 0.533-0.948             | 0.020   |
| Complications                                          |            |                         |         |
| ECMO circuit complications                             | 1.302      | 1.060-1.600             | 0.012   |
| CNS complications                                      | 2.189      | 1.672-2.866             | <0.001  |
| Pulmonary hemorrhage                                   | 2.811      | 1.859-4.252             | <0.001  |
| Renal failure                                          | 1.962      | 1.428-2.696             | <0.001  |
| Hemofiltration required                                | 1.823      | 1.457-2.280             | <0.001  |

**Model I:** Candidate variables: age, race (white), genetic syndrome or congenital anomalies, comorbidities, pre-ECMO cardiac arrest, CPB time, DHCA, RACHS-1 category, pre-ECMO echocardiography, pre-ECMO MV duration>24h, pre-ECMO bicarbonate infusion  
**N= 1987; Hosmer and Lemeshow Test p value= 0.547; area under the curve= 0.691**

**Model II:** Candidate variables: left atrium cannulation, cardiac and pulmonary failure indication group, ECMO pump flow at 4h, ECMO pump flow at 24h, ECMO support duration, on-ECMO invasive procedures, FiO2 at 24h after ECMO initiation, ECMO circuit complications, CNS complications, cardiac complications, pulmonary hemorrhage, cannulation/surgical site bleeding, hemolysis, disseminate intravascular coagulation, culture proven infection, renal failure, hemofiltration required, arterial pH <7.20, blood glucose >240 mg/dl, hyperbilirubinemia  
**N= 2011; Hosmer and Lemeshow Test p value= 0.331; area under the curve= 0.749**

CNS: Central Nervous System; CPB: Cardio-Pulmonary Bypass; ECMO: Extra-Corporeal Membrane Oxygenation; FiO2: Fraction of inspired Oxygen; RACHS-1: Risk Adjusted Congenital Heart Surgery Score 1; MV: Mechanical Ventilation

**Supplemental Information.** ICD9, ICD10 and CPT web references.

<https://www.ama-assn.org/practice-management/cpt/finding-coding-resources>

[https://www.cdc.gov/nchs/icd/icd10cm\\_pcs\\_resources.htm](https://www.cdc.gov/nchs/icd/icd10cm_pcs_resources.htm)

[https://www.cdc.gov/nchs/icd/icd9cm\\_addenda\\_guidelines.htm](https://www.cdc.gov/nchs/icd/icd9cm_addenda_guidelines.htm)
